# Supplementary material for: Perceptions and Use of Telehealth Among Mental Health, Primary, and Specialty Care Clinicians During the COVID-19 Pandemic
Source: PubMed Central journal article supplement (PMC9175071; doi:10.1001/jamanetworkopen.2022.16401), 2022-06-07
Supplement: jamanetwopen-e2216401-s001.pdf [file jamanetwopen-e2216401-s001.pdf]

## Supplemental Online Content

Connolly SL, Miller CJ, Gifford AL, Charness ME. Perceptions and use of telehealth among mental health, primary, and specialty care clinicians during the COVID-19 pandemic. *JAMA Netw Open*. 2022;5(6):e2216401. doi:10.1001/jamanetworkopen.2022.16401

**eAppendix 1.** Sample Definitions

**eAppendix 2.** VA New England Healthcare System Medical Centers

**eAppendix 3.** Full Survey

**eAppendix 4.** Estimated Response Rate Calculation

**eTable.** National VHA Completed Visits During August and September 2021

This supplemental material has been provided by the authors to give readers additional information about their work.

## **eAppendix 1. Sample Definitions**

### **Mental Health (MH)**

Providers: Physicians, psychologists, social workers, PharmDs, nurse practitioners, and physician assistants

### **Primary Care (PC)**

Primary Care, Women's Health, and General Internal Medicine

Providers: Physicians, PharmDs, nurse practitioners, and physician assistants

### **Specialty Care (SC)**

Anesthesiology, Cardiology, Cardiothoracic Surgery, Dermatology, Endocrinology, ENT, Gastroenterology, General Surgery, Geriatrics, Gynecology, Hematology/Oncology, Infectious Disease, Nephrology, Neurology, Neurosurgery, Ophthalmology, Orthopedics, Pain Medicine, Palliative care/Hospice, Plastic Surgery, Podiatry, Pulmonary/Allergy/Sleep/Critical Care Medicine, Radiology, Rehabilitation Medicine, Rheumatology, Spinal Cord Injury, Urgent Care/Emergency Medicine, Urology, Vascular surgery

Providers: Physicians, PharmDs, nurse practitioners, physician assistants, and podiatrists

## **eAppendix 2. VA New England Healthcare System Medical Centers**

Urban/suburban sites:

VA Bedford Healthcare System; Bedford, MA

Providence VA; Providence, RI

VA Boston Healthcare System; West Roxbury, MA

VA Connecticut Healthcare System; West Haven, CT

Rural sites:

Manchester VA Medical Center; Manchester, NH

VA Central Western Massachusetts Healthcare System; Northampton, MA

VA Maine Healthcare System; Augusta, ME

White River Junction VA; White River Junction, VT

## eAppendix 3. Full Survey

1. Select the location you are affiliated with.
  - a. Bedford
  - b. Boston
  - c. Central Western Massachusetts
  - d. Connecticut
  - e. Maine
  - f. Manchester
  - g. Providence
  - h. White River Junction
  
2. Select your primary work setting. (For example, if your clinic is located in a CBOC, choose CBOC, even if you are currently working from home)
  - a. Main hospital/multi-campus location
  - b. CBOC
  - c. Other (please specify)
  
3. Are you a full-time or part-time VA employee?
  - a. Full-time
  - b. Part-time
  - c. Other (please specify)
  
4. Please indicate your occupation.
  - a. Audiologist
  - b. CNS
  - c. Dentist
  - d. LPN
  - e. Nurse practitioner
  - f. Occupational therapist
  - g. Optometrist
  - h. PA
  - i. PharmD
  - j. Physical therapist
  - k. Physician
  - l. Podiatrist
  - m. Psychologist
  - n. RN
  - o. Social worker
  - p. Speech pathologist
  - q. Other (please specify)

5. What is the main type of outpatient service you provide? (please select only one option)
- a. Anesthesiology
  - b. Audiology
  - c. Cardiology
  - d. Cardiothoracic surgery
  - e. Dental
  - f. Dermatology
  - g. Endocrinology
  - h. ENT
  - i. Gastroenterology
  - j. General Internal Medicine
  - k. General Surgery
  - l. Geriatrics
  - m. Gynecology
  - n. Hematology/Oncology
  - o. Home Based Primary Care
  - p. Homeless Outreach/Housing
  - q. Infectious Disease
  - r. Mental Health
  - s. Nephrology
  - t. Neurology
  - u. Neurosurgery
  - v. Occupational therapy
  - w. Ophthalmology
  - x. Optometry
  - y. Orthopedics
  - z. Pain Medicine
  - aa. Palliative Care/Hospice
  - bb. Physical Therapy
  - cc. Plastic Surgery
  - dd. Podiatry
  - ee. Primary Care
  - ff. Prosthetics
  - gg. Pulmonary, Allergy, Sleep, Critical Care Medicine
  - hh. Radiology
  - ii. Rehabilitation Medicine
  - jj. Rheumatology
  - kk. Speech Pathology/Speech Therapy
  - ll. Spinal Cord Injury

- mm. Urology
- nn. Vascular Surgery
- oo. Women's Health
- pp. Other (please specify)

6. Please estimate the percentage of your total outpatient appointments that you completed in-person in the past 3 months.  
0-100% in 10% increments
7. Please estimate the percentage of your total outpatient appointments that you completed by phone in the past 3 months.  
0-100% in 10% increments
8. Please estimate the percentage of your total outpatient appointments that you completed by video telehealth in the past 3 months. (e.g., VA Video Connect, Doximity Video, Zoom, Facetime, WebEx, or similar)  
0-100% in 10% increments

The next questions refer to **quality of care**. Quality refers to whether care is effective, safe, timely, efficient, equitable, and patient-centered.

9. Rate the quality of care you deliver via **video telehealth** to **new** patients.
  - a. lower quality than in-person with masks/ equivalent to in-person with masks/ higher than in-person with masks/ N/A
10. Rate the quality of care you deliver via **video telehealth** to **established** patients.
  - a. lower quality than in-person with masks/ equivalent to in-person with masks/ higher than in-person with masks/ N/A
11. Rate the quality of care you deliver via **phone** to **new** patients.
  - a. lower quality than in-person with masks/ equivalent to in-person with masks/ higher than in-person with masks/ N/A
  - b. lower quality than video / equivalent to video/ higher than video/ N/A
12. Rate the quality of care you deliver via **phone** to **established** patients.
  - a. lower than in-person with masks/ equivalent to in-person with masks/ higher than in-person with masks/ N/A
  - b. lower quality than video / equivalent to video/ higher than video/ N/A
13. Please rate how each of the following factors contribute to which care modality (phone, video, or in-person) you use with a given patient.

Major contributor      Somewhat of a contributor      Not a contributor

- My clinical judgment
- Patient preference
- Scheduler preference/messaging
- Leadership guidance
- Workload credit
- Available data/research comparing effectiveness of the modalities
- Other (Please specify)

14. Please rate the following aspects of conducting **phone** appointments in the past 3 months.

Not a challenge    Somewhat of a challenge    Significant challenge    N/A

- Hearing the patient adequately
- Patient hearing me adequately
- Establishing rapport with the patient
- Ensuring patient's safety and confidentiality
- Assessing physical health status
- Inability to conduct a physical exam to the degree required
- Receiving full workload credit for appointments
- Poor communication/support from leadership re: phone appointments
- Other

15. What percentage of the time have you experienced a technology issue when conducting a **phone** appointment in the past 3 months? (e.g., poor audio, call dropped)

0-100% in 10% increments

16. Please rate your satisfaction with the following aspects of VA Video Connect in the past 3 months.

Very dissatisfied    Dissatisfied    Neutral    Satisfied    Very Satisfied    N/A

- Ease of use
- Coordination/scheduling of appointments
- Audio and video quality
- Overall satisfaction

17. What percentage of the time have you experienced a technology issue when conducting a VA Video Connect appointment in the past 3 months? (e.g., poor audio or video, call dropped, patient or provider unable to see or hear each other, link does not work)

0-100%, increments of 10%

18. What percentage of your video telehealth appointments have been successfully completed via VA Video Connect in the past 3 months? (e.g., did not have to convert to a phone visit or to an alternate video telehealth platform, or reschedule due to technological difficulties)

0-100%, 10% increments

19. Have you used any other platforms to conduct video telehealth appointments with your VA patients in the past 3 months?

I have not used any other telehealth platforms

Doximity Video

Facetime

Cisco Webex Meetings/ Webex Teams

Microsoft Teams

Skype (standard)

Skype for Business

Zoom (standard)

Zoom for Healthcare

GoToMeeting

Doxy.me

Google Duo

Other (please specify)

20. Do you/would you prefer using any of the following platforms over VA Video Connect?

Select all that apply:

No, I do not prefer an alternative platform.

Doximity Video

Facetime

Cisco Webex Meetings/ Webex Teams

Microsoft Teams

Skype (standard)

Skype for Business

Zoom (standard)

Zoom for Healthcare

GoToMeeting

Doxy.me

Google Duo

Other (please specify)

21. Please select reasons why you prefer an alternative video telehealth platform(s) over VA Video Connect (select all that apply):

Easier to use



Better audio/video quality  
More features (e.g., virtual backgrounds, better grid views of multiple attendees, allows for call-in by phone only)  
More reliable (e.g., Calls do not drop, or do not drop as often)  
I'm already familiar with the platform  
VA Video Connect does not work on my device  
VA Video Connect does not work on patient's device  
Patients already familiar with the platform  
Patients requested to use the platform  
Other (please specify)  
N/A

22. Please rate the following technical aspects on the **provider side** when conducting video telehealth appointments in the past 3 months.

Not a challenge   Somewhat of a challenge   Significant challenge   N/A

Hearing the patient adequately  
Seeing the patient adequately  
Having access to adequate internet connection (provider side)  
Difficulty using my device and/or using video telehealth platforms  
Scheduling processes  
Converting an ongoing visit from phone to video  
Receiving full workload credit for appointments  
Placing a "digital divide consult" to order the patient a tablet if needed  
Lack of technical support/training for providers  
Insufficient communication/support from leadership re: telehealth

23. Please rate the following technical aspects on the **patient side** when conducting video telehealth appointments in the past 3 months.

Not a challenge   Somewhat of a challenge   Significant challenge   N/A

Patient hearing me adequately  
Patient seeing me adequately  
Patient having access to adequate internet connection  
Patient having difficulty using their device and/or using video telehealth platforms  
Lack of general technical support/training for patients (e.g. test calls before appointment)  
Lack of technical support/training for patients **who have received a tablet via the digital divide consult** (e.g. assistance with tablet set up)

24. Please rate these additional aspects of conducting video telehealth appointments in the past 3 months.

Not a challenge   Somewhat of a challenge   Significant challenge   N/A

Establishing rapport with the patient

Ensuring patient's safety and confidentiality

Assessing physical health status

Inability to conduct a physical exam to the degree required

Inappropriate or distracting patient behavior (e.g. patient not properly clothed, in bed, children/pets interrupting appointment)

25. When caring for **new** patients remotely, do you generally prefer conducting phone visits or video telehealth visits?

Phone visits / Video telehealth visits/No preference/ Other (please specify)

26. When caring for **established** patients remotely, do you generally prefer conducting phone visits or video telehealth visits?

Phone visits / Video telehealth visits/No preference/ Other (please specify)

27. In your estimation, what percentage of your patients prefer/request **phone care** (over video or in-person)?

0-100%, 10% increments   Don't know   N/A

28. In your estimation, what percentage of your patients prefer/request **video care** (over phone or in-person)?

0-100%, 10% increments   Don't know   N/A

29. Moving forward, what percentage of **new** patients would you be comfortable caring for using the following modalities:

0-100%, 10% increments N/A

a. In-person (patient/provider wearing masks)

b. Phone

c. Video telehealth

30. Moving forward, what percentage of **established** patients would you be comfortable caring for using the following modalities:

0-100%, 10% increments N/A

a. In-person (patient/provider wearing masks)

- b. Phone
- c. Video telehealth

31. Please rate your satisfaction conducting video telehealth and/or phone appointments **from your own home** in the past 3 months.

Very dissatisfied Dissatisfied Neutral Satisfied Very satisfied N/A

32. What percentage of the time would you prefer to provide remote care (via phone or video) from **your own home or other personal location**?

0% (I prefer providing all remote care from my office) -100%, 10% increments N/A

If provider answers anything other than 0% on question 32:

Please rate how each of the following factors contribute to your preference for providing remote care from your own home or other personal location.

Major contributor      Somewhat of a contributor      Not a contributor

- Saves time not having to commute to work
- Saves money not having to commute to work
- Lack of available/suitable office space at the VA
- Lack of parking at the VA
- More comfortable at home/other personal location (e.g., access to comfortable furniture, temperature control, kitchen)
- Responsibilities caring for family members/pets

33. Please provide any suggestions regarding how VISN 1 can make virtual care more accessible and satisfactory.

**SURVEY ENDS**

## **eAppendix 4. Estimated Response Rate Calculation**

Given that survey links were distributed to providers via the service chiefs of their respective medical centers through separate email listservs, the exact number of eligible providers reached by the survey invitation is unknown, and we are therefore unable to calculate an exact response rate. The number of overall active providers within the included services and provider categories (see Supplement 1) in the thirty days prior to data analysis was derived from the VA Support Service Center Capital Assets (VSSC) operations database (n=1354). The estimated response rate was calculated by dividing the number of survey respondents (n=866) by this number of active providers (n=1354), yielding a value of 64%.

**eTable.** National VHA Completed Visits During August and September 2021

| Specialty      | Patient type | N (%) of overall completed visits |                |                |
|----------------|--------------|-----------------------------------|----------------|----------------|
|                |              | In-person                         | Phone          | Video          |
| Overall        | New          | 937064 (80.9)                     | 92063 (7.9)    | 80060 (6.9)    |
|                | Established  | 5602052 (68.3)                    | 1279235 (15.6) | 1208143 (14.7) |
| Mental health  | New          | 26385 (48.4)                      | 10805 (19.8)   | 16349 (30.0)   |
|                | Established  | 580938 (34.4)                     | 310769 (18.4)  | 768164 (45.5)  |
| Primary care   | New          | 87822 (78.7)                      | 13301 (11.9)   | 9548 (8.6)     |
|                | Established  | 1471210 (66.2)                    | 594860 (26.8)  | 140102 (6.3)   |
| Specialty care | New          | 822857 (82.9)                     | 67957 (6.8)    | 54163 (5.5)    |
|                | Established  | 3549904 (82.8)                    | 373606 (8.7)   | 299877 (7.0)   |

Note: N= 9,198,617. Electronic consultations comprised a small percentage of completed visit and are not shown; therefore, some categories do not sum to 100% (see Methods section for further detail).

Across specialties, new patients received care in-person at higher rates than established patients ( $\chi^2 = 110248.2, p < .0001$ ). MH provided the highest percentage of video visits, for both new ( $\chi^2 = 64829.3, p < 0.001$ ) and established ( $\chi^2 = 2103204, p < .0001$ ) patients. When considering established patients, SC provided the most in-person care, while PC demonstrated the highest rates of phone care across specialties ( $\chi^2 = 2103204, p < .0001$ ).
